# Supplementary material for: Discovery of potential RIPK1 inhibitors by machine learning and molecular dynamics simulations
Source: Royal Society of Chemistry journal article supplement (doi:10.1039/d3cp03755j), 2023-01-01
Supplement: d3cp03755j1.pdf [file d3cp03755j1.pdf]

## Supporting Information

### Discovery of Potential RIPK1 Inhibitors by Machine Learning and Molecular Dynamics Simulations

Ji-xiang Liu<sup>a</sup>, Ri-song Na<sup>b</sup>, Lian-juan Yang<sup>c</sup>, Xu-ri Huang<sup>a</sup>, Xi Zhao<sup>\*a</sup>

a, Institute of Theoretical Chemistry, College of Chemistry, Jilin University, Liutiao Road #2, Changchun 130021, China.

b, Collaborative Innovation Center of Henan Grain Crops, National Key Laboratory of Wheat and Maize Crop Science, College of Plant Protection, Henan Agricultural University, Zhengzhou 450002, China.

c, Department of Medical Mycology, Shanghai Skin Disease Hospital, Tongji University School of Medicine, Shanghai, 200443, China.

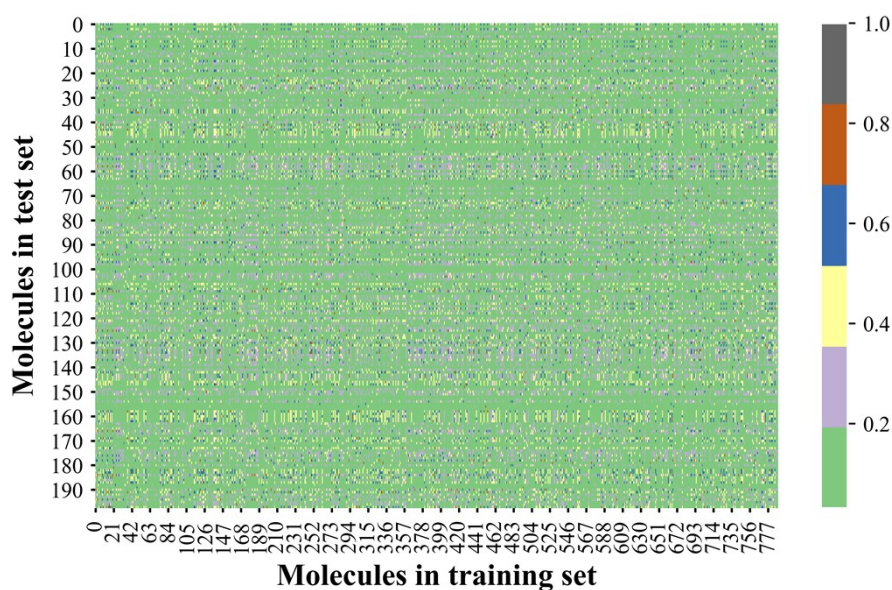

**Figure S1. Comparison of molecular similarity between the training set and the test set and the closer to 1, the higher the similarity.**

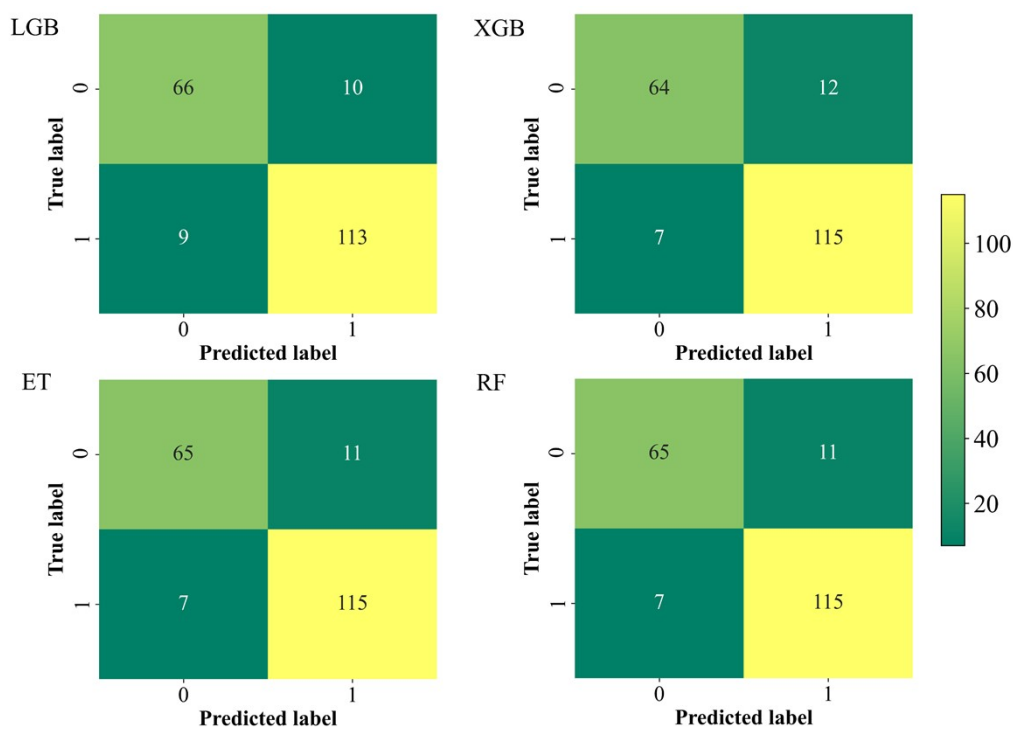

**Figure S2. Confusion matrix of the test set of the four models.**

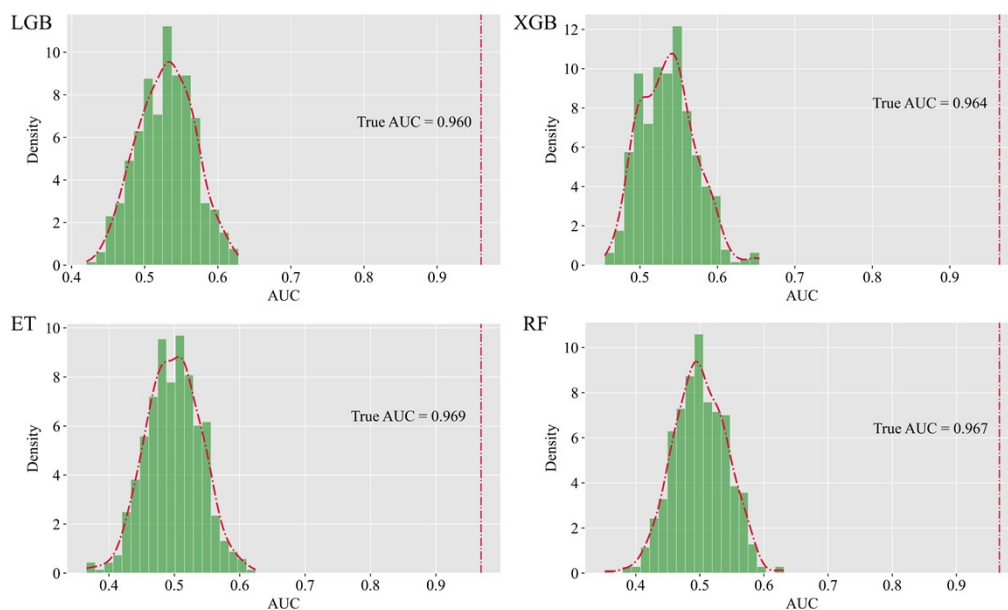

**Figure S3. Distribution of AUC for the four randomized models compared with the true model in the Y-randomization test. The red vertical dashed line on the right represents the AUC of the true model, and the distribution on the left side represents the distribution of AUC values of randomized models.**

A total of 500 random prediction models were constructed and a series of AUC values were obtained. The distributions of Y-randomized AUC of the predictive models and the fitted curves for RIPK1 activity prediction are shown in **Figure S3**. Compared

with the AUC of the original model, the AUC values of randomly shuffled models varied from 0.3656 to 0.6543 there is a statistically significant difference.

**Table S1. Optimization Parameters**

| Models | Parameters        | Meaning                   | Values          |
|--------|-------------------|---------------------------|-----------------|
| LGB    | max_depth         | Tree depth                | 9               |
|        | eta               | Learning rate             | 0.1             |
|        | objective         | Loss function             | binary          |
|        | metric            | Evaluation metrics        | auc             |
|        | feature_fraction  | Sampling ratio            | 0.7267          |
|        | lambda_l1         | Regularization            | 1               |
|        | num_leaves        | Number of leaves          | 34              |
|        | num_round         | Max. number of iterations | 1000            |
| XGB    | max_depth         | Tree depth                | 6               |
|        | eta               | Learning rate             | 0.1             |
|        | objective         | Loss function             | binary:logistic |
|        | eval_metric       | Evaluation metrics        | auc             |
|        | lambda            | Regularization            | 1               |
|        | colsample_bytree  | Column sampling           | 0.8             |
|        | subsample         | Sampling ratio            | 0.8             |
|        | gamma             | Node splitting            | 0.1             |
|        | min_child_weight  | Minimum leaf weights      | 1               |
|        | num_round         | Max. number of iterations | 1000            |
| ET     | max_depth         | Tree depth                | 19              |
|        | max_features      | Sampling ratio            | 0.0997          |
|        | min_samples_split | Minimum sample split      | 59              |
|        | n_estimators      | Number of decision trees  | 104             |
| RF     | max_depth         | Tree depth                | 10              |
|        | max_features      | Sampling ratio            | 0.1             |
|        | min_samples_split | Minimum sample split      | 27              |
|        | n_estimators      | Number of decision trees  | 72              |

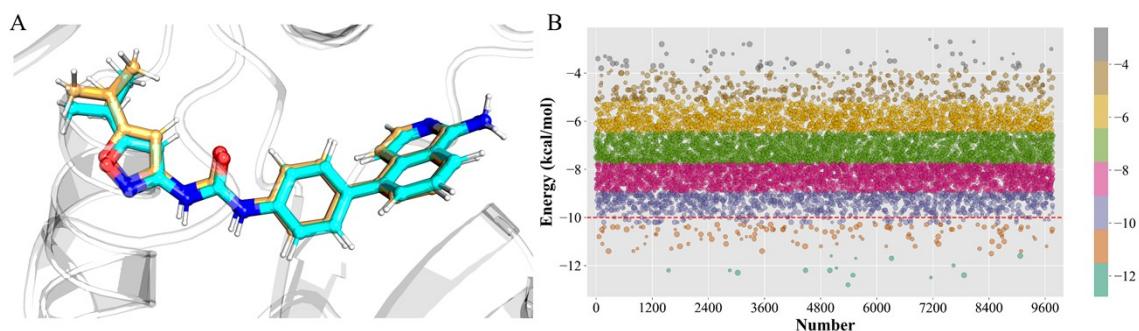

**Figure S4. (A) Conformational overlay of the re-docked. Cyan is the re-docked molecule. (B) The distribution of the docking results for all molecules, where the red dashed line is energy = -10 (kcal/mol).**

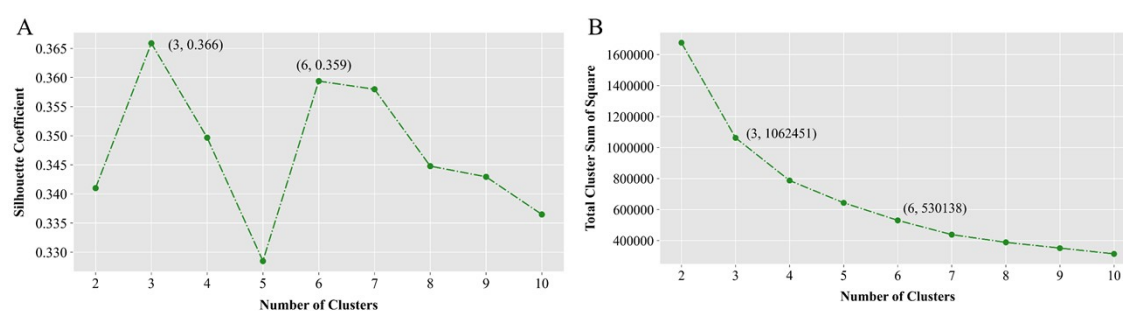

**Figure S5. Evaluation metrics for K-means clustering. (A) Line plot of silhouette coefficients, (B) line plot of total cluster sum of square.**

For clustering, the larger the value of the silhouette coefficient the better, and the smaller the total cluster sum of square the better, so according to **Figure S5** we consider six classes to be more reasonable.

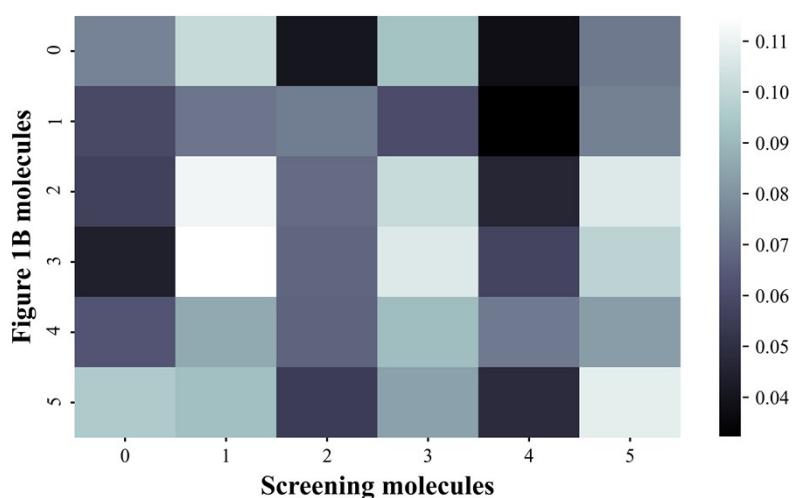

**Figure S6. The similarity of the six selected molecules to the molecules listed in Figure 1B.**

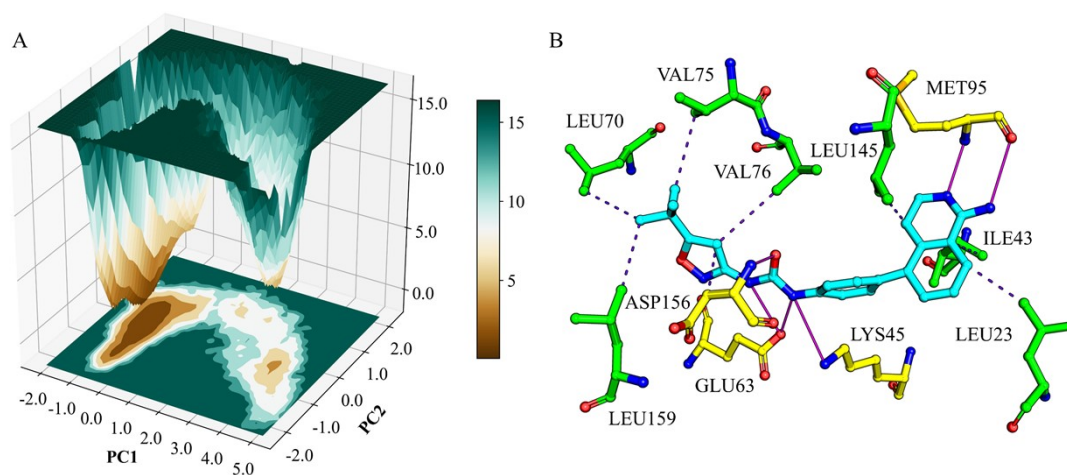

**Figure S7. (A) The FEL of the co-crystal complex system. (B) The interaction of the co-crystal complex system.**

**Table S2. Key Interactions in the Seven Complexes During the Simulation.**

| Molecules | Residues | Occupancy (%) | Interaction | Average number of hydrogen bonds |
|-----------|----------|---------------|-------------|----------------------------------|
| Cpd-1     | Ser25    | 21.8          | H-bond      | 1.168                            |
|           | Asn99    | 20.5          | H-bond      |                                  |
|           | Glu142   | 42.8          | H-bond      |                                  |
| Cpd-2     | Lys45    | 10.1          | H-bond      | 2.132                            |
|           | Glu63    | 69.6          | Salt bridge |                                  |
|           | Asp156   | 110.0         | H-bond      |                                  |
| Cpd-3     | Asp24    | 80.6          | H-bond      | 2.156                            |
|           | Asn99    | 20.4          | H-bond      |                                  |
|           | Asp156   | 90.1          | H-bond      |                                  |
| Cpd-4     | Met95    | 59.9          | H-bond      | 1.928                            |
|           | Asp156   | 74.8          | H-bond      |                                  |
|           | Ala313   | 37.3          | H-bond      |                                  |
| Cpd-5     | Glu63    | 82.7          | H-bond      | 1.763                            |
|           | Met95    | 85.2          | H-bond      |                                  |
| Cpd-6     | Glu63    | 40.5          | H-bond      | 1.600                            |
|           | Val76    | 20.4          | H-bond      |                                  |
|           | Asp156   | 87.9          | H-bond      |                                  |

|      |        |       |        |       |
|------|--------|-------|--------|-------|
|      | Glu63  | 196.3 | H-bond |       |
| 4NEU | Met95  | 176.9 | H-bond | 4.619 |
|      | Asp156 | 88.5  | H-bond |       |

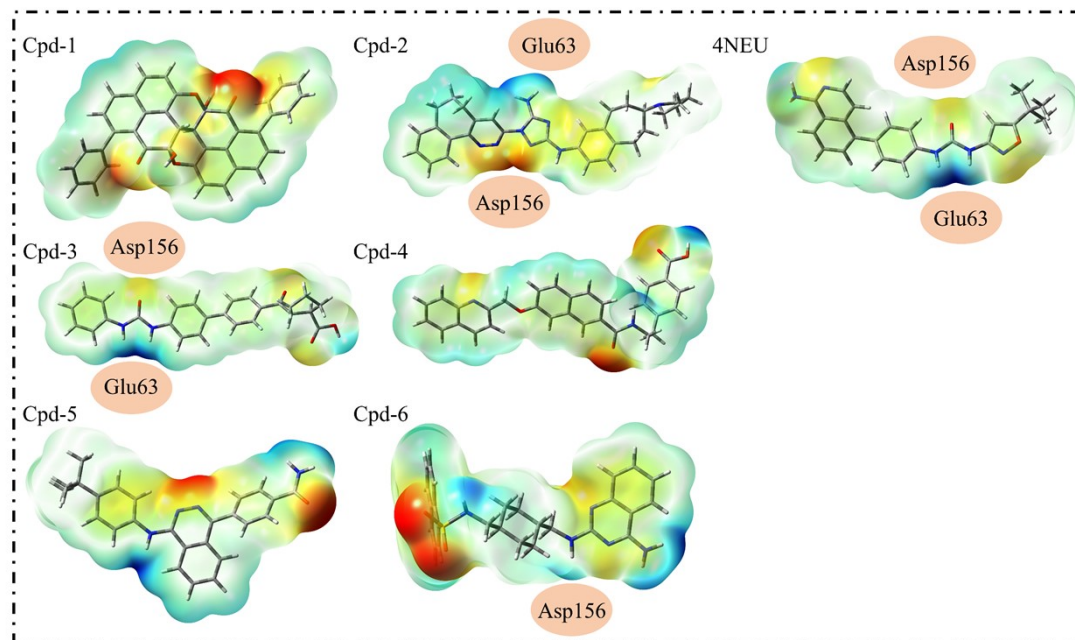

**Figure S8. Electrostatic potential graph of seven small molecules. Blue represents the positive potential, red represents the negative potential, the darker the color the greater the potential, light pink ovals represent acidic amino acids.**

**Table S3. The various decomposition energies of the important residues in the seven complexes (kJ/mol)**

| Residues | Cpd-1               | Cpd-2   | Cpd-3   | Cpd-4  | Cpd-5   | Cpd-6  | 4NEU    |
|----------|---------------------|---------|---------|--------|---------|--------|---------|
| Leu23    | 0.219 <sup>a</sup>  | -0.010  | -0.239  | 0.477  | 0.164   | 0.133  | 0.248   |
|          | -6.530 <sup>b</sup> | -3.105  | -12.669 | -4.092 | -2.544  | -8.829 | -3.419  |
|          | 0.662 <sup>c</sup>  | 0.352   | 6.924   | 0.011  | 0.126   | 0.732  | 0.070   |
|          | -0.994 <sup>d</sup> | -0.527  | -1.708  | -0.887 | -0.543  | -1.602 | -0.543  |
|          | -6.643 <sup>e</sup> | -3.382  | -7.692  | -4.491 | -2.797  | -9.566 | -3.644  |
| Val31    | -0.098              | -0.144  | 0.055   | -0.031 | 0.290   | 0.040  | -0.157  |
|          | -3.756              | -3.590  | -5.706  | -2.571 | -4.483  | -2.740 | -4.168  |
|          | 0.570               | 0.978   | 0.882   | 0.307  | 0.590   | 0.507  | 0.671   |
|          | -0.408              | -0.311  | -0.525  | -0.320 | -0.553  | -0.213 | -0.426  |
|          | -3.692              | -3.066  | -5.294  | -2.615 | -4.155  | -2.406 | -4.080  |
| Ile43    | 0.081               | -0.209  | -0.270  | -0.382 | -0.334  | 0.049  | -0.298  |
|          | -4.230              | -6.026  | -3.139  | -8.132 | -7.368  | -4.969 | -7.183  |
|          | 0.383               | 0.546   | 0.945   | 0.099  | 1.022   | 0.348  | 0.487   |
|          | -0.668              | -0.851  | -0.124  | -0.690 | -0.576  | -0.703 | -0.455  |
|          | -4.433              | -6.540  | -2.588  | -9.105 | -7.255  | -5.275 | -7.448  |
| Glu63    | 1.916               | -7.496  | -9.479  | -1.770 | -16.386 | 0.516  | -25.845 |
|          | -0.378              | -1.406  | -3.444  | -0.695 | -3.406  | -0.804 | -1.741  |
|          | 1.723               | -1.648  | 24.723  | 3.522  | 29.561  | -0.518 | 30.434  |
|          | -0.038              | -0.070  | -0.246  | -0.002 | -0.277  | -0.013 | -0.306  |
|          | 3.223               | -10.621 | 11.554  | 1.055  | 9.492   | -0.818 | 2.541   |
| Met67    | -0.012              | -1.001  | -1.563  | -0.624 | 0.880   | -0.987 | -0.070  |
|          | -1.169              | -8.268  | -7.591  | -7.423 | -7.038  | -7.356 | -8.679  |
|          | 0.531               | 2.580   | 2.843   | 3.087  | 1.709   | 3.453  | 0.761   |
|          | -0.203              | -0.644  | -0.556  | -0.497 | -0.457  | -0.699 | -0.406  |
|          | -0.852              | -7.333  | -6.866  | -5.458 | -4.906  | -5.588 | -8.395  |
| Val75    | -0.107              | 0.388   | -0.201  | -0.506 | -0.060  | -0.330 | 0.127   |
|          | -0.180              | -2.298  | -1.757  | -3.479 | -2.901  | -2.774 | -3.411  |
|          | 0.091               | 0.047   | 0.433   | -0.624 | 0.834   | -0.139 | 0.225   |
|          | -0.000              | -0.135  | -0.136  | -0.327 | -0.110  | -0.343 | -0.194  |
|          | -0.196              | -1.999  | -1.661  | -4.936 | -2.237  | -3.586 | -3.253  |
| Val76    | -0.131              | -0.604  | -0.426  | -1.827 | -0.641  | -4.169 | -0.677  |
|          | -3.180              | -3.835  | -5.449  | -8.800 | -8.043  | -6.539 | -6.568  |
|          | 0.414               | 0.303   | 1.291   | 8.672  | 0.511   | 8.598  | 2.915   |
|          | -0.263              | -0.133  | -0.200  | -0.520 | -0.368  | -0.447 | -0.230  |
|          | -3.160              | -4.270  | -4.783  | -2.476 | -8.540  | -2.558 | -4.560  |
| Met92    | -0.239              | 0.201   | -1.287  | 0.095  | 0.309   | 0.262  | -0.673  |
|          | -3.303              | -5.482  | -4.029  | -6.462 | -9.285  | -5.943 | -5.537  |
|          | 1.463               | 0.830   | 2.487   | 1.504  | 1.350   | 2.166  | 1.941   |
|          | -0.349              | -0.458  | -0.323  | -0.446 | -0.580  | -0.580 | -0.410  |
|          | -2.428              | -4.909  | -3.152  | -5.310 | -8.207  | -4.095 | -4.679  |

|        |        |        |        |        |        |        |         |
|--------|--------|--------|--------|--------|--------|--------|---------|
| Asn143 | -1.010 | 0.027  | -0.803 | 0.020  | 0.605  | 0.103  | 0.060   |
|        | -7.017 | -0.970 | -9.804 | -0.687 | -0.805 | -2.074 | -0.843  |
|        | 3.372  | -0.307 | 8.605  | 0.224  | -0.962 | 0.724  | 0.356   |
|        | -0.192 | -0.002 | -0.800 | -0.003 | 0.000  | -0.183 | -0.009  |
|        | -4.847 | -1.252 | -2.803 | -0.446 | -1.162 | -1.431 | -0.437  |
| Leu145 | -0.140 | -0.118 | -0.053 | -0.609 | -0.474 | -0.283 | -0.444  |
|        | -8.565 | -5.039 | -3.697 | -8.086 | -6.745 | -6.312 | -6.640  |
|        | 0.805  | 0.514  | 0.591  | 0.471  | 0.652  | 1.038  | 0.745   |
|        | -1.114 | -1.064 | -0.265 | -1.034 | -0.999 | -1.031 | -0.973  |
|        | -9.013 | -5.708 | -3.424 | -9.258 | -7.566 | -6.589 | -7.312  |
| Ala155 | -1.407 | -2.250 | -4.154 | -2.379 | -3.280 | -1.963 | -2.393  |
|        | -3.909 | -7.775 | -6.344 | -6.615 | -7.231 | -7.271 | -6.635  |
|        | 1.464  | 3.759  | 2.798  | 3.313  | 4.691  | 3.526  | 3.077   |
|        | -0.472 | -0.272 | -0.345 | -0.516 | -0.440 | -0.690 | -0.302  |
|        | -4.324 | -6.502 | -8.044 | -6.197 | -6.259 | -6.399 | -6.253  |
| Asp156 | 3.091  | -4.649 | 0.648  | -2.091 | 0.233  | -1.138 | -1.384  |
|        | -2.915 | -9.977 | -6.366 | -5.333 | -9.992 | -6.904 | -11.022 |
|        | 1.911  | 17.543 | 2.664  | 7.430  | 13.097 | 6.141  | 17.369  |
|        | -0.288 | -1.126 | -0.441 | -0.285 | -0.626 | -0.541 | -0.750  |
|        | 1.799  | 1.791  | -3.496 | -0.279 | 2.712  | -2.441 | 4.214   |
| Leu157 | 0.156  | 0.997  | 0.129  | 0.169  | -0.063 | 0.082  | -0.004  |
|        | -8.561 | -9.451 | -4.223 | -3.705 | -1.592 | -6.161 | -4.001  |
|        | 0.723  | 0.078  | 0.706  | 0.696  | 0.170  | 0.389  | 0.467   |
|        | -1.039 | -0.570 | -0.113 | -0.535 | -0.095 | -0.876 | -0.413  |
|        | -8.720 | -8.947 | -3.502 | -3.375 | -1.580 | -6.565 | -3.951  |
| Leu159 | -0.081 | 0.577  | -1.377 | -0.135 | 0.581  | -0.266 | -0.324  |
|        | -0.242 | -4.711 | -7.269 | -4.808 | -4.341 | -1.723 | -2.183  |
|        | -0.180 | 0.393  | 2.072  | -0.420 | -0.645 | 0.353  | -0.347  |
|        | -0.006 | -0.489 | -0.522 | -0.341 | -0.399 | -0.249 | -0.155  |
|        | -0.509 | -4.230 | -7.096 | -5.703 | -4.804 | -1.886 | -3.010  |

(a:  $\Delta E_{\text{ele}}$  b:  $\Delta E_{\text{vdW}}$  c:  $\Delta G_{\text{PB}}$  d:  $\Delta G_{\text{NP}}$  e:  $\Delta G_{\text{bind}}$ )
